# Supplementary material
Source: ML conference proceedings conference paper supplement (https://proceedings.mlr.press/v89/jang19a.html)
Supplement: Supplementary file [file jang19a-supp.pdf]

## A Algorithm Analysis

### A.1 ADMM update derivation

For completeness, we derive the ADMM steps of the problem in (12). Given current iterates  $V_1^t, \gamma^t$ , and  $\Lambda^t$ ,

$$\begin{aligned}
 V_1^{t+1} &= \arg \min_{V_1 \in \mathbb{R}^{n \times k}} \left\{ \mu \|V_1\|_h + \frac{\rho}{2} \|\widetilde{W}\gamma^t - V_1\|_F^2 \right. \\
 &\quad \left. + \langle \Lambda_1, \widetilde{W}\gamma^t - V_1 \rangle \right\} \\
 &= \arg \min_{V \in \mathbb{R}^{n \times k}} \left\{ \frac{\mu}{\rho} \|V\|_h + \frac{1}{2} \left\| V_1 - \frac{\rho \widetilde{W}\gamma^t + \Lambda_1^t}{\rho} \right\|_F^2 \right\} \\
 &= \text{Soft-Threshold}_{\mu/\rho} \left( \frac{\rho \widetilde{W}\gamma^t + \Lambda_1^t}{\rho} \right)
 \end{aligned} \tag{14}$$

where we soft-threshold the matrix with the regularization parameter  $\frac{\mu}{\rho}$ .

$$\begin{aligned}
 V_2^{t+1} &= \arg \min_{V_2 \in \mathbb{R}^{k \times k}} \left\{ \frac{\rho}{2} \|\gamma^t - V_2\|_F^2 + \langle \Lambda_2, \gamma^t - V_2 \rangle \right. \\
 &\quad \left. + \mathbf{1}(\lambda_{\min}(V_2 V_2^T) \geq \frac{1}{R^2}) \right\} \\
 &= \arg \min_{V_2 \in \mathbb{R}^{k \times k}} \left\{ \frac{1}{2} \left\| V_2 - \frac{\rho \gamma^t + \Lambda_2^t}{\rho} \right\|_F^2 \right. \\
 &\quad \left. + \mathbf{1}(\sigma_{\min}(V_2) \geq \frac{1}{R}) \right\} \\
 &= \text{Proj}_{G_R} \left( \frac{\rho \gamma^t + \Lambda_2^t}{\rho} \right)
 \end{aligned} \tag{15}$$

where  $G_R = \{X \in \mathbb{R}^{n \times k} | \sigma_{\min}(X) \geq \frac{1}{R}\}$  and  $\text{Proj}_{G_R}$  is the projection onto the set  $G_R$ .

$$\begin{aligned}
 \gamma^{t+1} &= \arg \min_{\gamma \in \mathbb{R}^{k \times k}} \left\{ -\log |\det \gamma \gamma^T| + \frac{\rho}{2} \|\widetilde{W}\gamma - V_1\|_F^2 \right. \\
 &\quad + \langle \Lambda, \widetilde{W}\gamma - V_1 \rangle + \frac{\rho}{2} \|\gamma - V_2\|_F^2 \\
 &\quad \left. + \langle \Lambda_2, \gamma - V_2 \rangle \right\} \quad \text{s.t.} \quad \gamma \mathbf{1}_K = \mathbf{a} \\
 &= \arg \min_{\gamma \in \mathbb{R}^{k \times k}} \left\{ -\log |\det \gamma \gamma^T| + \frac{\rho}{2} \|C^{1/2}(\gamma - A)\|_F^2 \right\} \\
 &\quad \text{s.t.} \quad \gamma \mathbf{1}_K = \mathbf{a}
 \end{aligned} \tag{16}$$

where we have that

$$\begin{aligned}
 A &= C^{-1} B^T = U D_A V^T \\
 B &= (V_1^{t+1})^T \widetilde{W} + (V_2^{t+1})^T - \frac{(\Lambda_2)^t{}^T}{\rho} - \frac{(\Lambda_1)^t{}^T \widetilde{W}}{\rho} \\
 C &= I + \widetilde{W}^T \widetilde{W}
 \end{aligned}$$

We can derive the update for  $\gamma^{t+1}$ , as it is a convex problem with a linear constraint. First, consider the

(16) without the linear constraint  $\gamma \mathbf{1} = \mathbf{a}$ . Then, we can rewrite the unconstrained  $\gamma$ -subproblem as

$$\begin{aligned}
 \gamma_+ &= \arg \min_{\gamma \in \mathbb{R}^{k \times k}} \left\{ -\log(\det \gamma \gamma^T) + \frac{\rho}{2} \|C^{1/2}(\gamma - A)\|_F^2 \right\} \\
 &= \arg \min_{\gamma \in \mathbb{R}^{k \times k}} \left\{ -\log(\det \gamma \gamma^T) + \frac{\rho}{2} \text{tr}(\gamma^T C \gamma) \right. \\
 &\quad \left. - \rho \text{tr}(\gamma^T C A) \right\} \\
 &= \arg \min_{\gamma = U D V^T} \left\{ -\log(\det \gamma \gamma^T) + \frac{\rho}{2} \text{tr}(\gamma^T C \gamma) \right. \\
 &\quad \left. - \rho \text{tr}(\gamma^T C A) \right\} \\
 &= \arg \min_{\gamma = U D V^T} \left\{ -\log(\det D^2) + \frac{\rho}{2} \text{tr}(U D^2 U^T C) \right. \\
 &\quad \left. - \rho \text{tr}(U D_A D U^T C) \right\} \\
 &= \arg \min_{\gamma = U D V^T} \left\{ -\sum_{i=1}^K 2 \log |D_{ii}| + \frac{\rho}{2} \text{tr}(E D^2) - \rho \text{tr}(F D) \right\} \\
 &= \arg \min_{\gamma = U D V^T} \left\{ -\sum_{i=1}^K 2 \log |D_{ii}| + \frac{\rho}{2} E_{ii} D_{ii}^2 - \rho F_{ii} D_{ii} \right\}
 \end{aligned}$$

where  $E = U^T C U$  and  $F = U^T C U D_A$ . Then we can solve the above problem element by element. Looking at the  $i$ -th entry, we can take the derivative and set it to zero. That is

$$\frac{\partial}{\partial D_{ii}} \left( \log |D_{ii}| + \frac{\rho}{2} E_{ii} D_{ii}^2 - \rho F_{ii} D_{ii} \right) = 0$$

leading to the following quadratic formula

$$D_{ii}^2 - \frac{F_{ii}}{E_{ii}} D_{ii} - \frac{2}{\rho E_{ii}} = 0$$

which has the solution

$$\widehat{D}_{ii} = \frac{\frac{F_{ii}}{E_{ii}} + \sqrt{\frac{F_{ii}^2}{E_{ii}^2} + \frac{8}{\rho E_{ii}}}}{2}$$

Then, using these diagonal elements  $\widehat{D}_{ii}$ , it follows that

$$\begin{aligned}
 \gamma_+ &= \arg \min_{\gamma \in \mathbb{R}^{k \times k}} \left\{ -\log(\det \gamma \gamma^T) + \frac{\rho}{2} \|C^{1/2}(\gamma - A)\|_F^2 \right\} \\
 &= U \widehat{D} V^T
 \end{aligned}$$

We make the final adjustment to satisfy the linear constraint. Thus, the  $\gamma$  update is

$$\gamma^{(t+1)} = \gamma_+ - (\gamma_+ \mathbf{1} - \mathbf{a})(\mathbf{1}^T C^{-1} \mathbf{1})^{-1} \mathbf{1}^T C^{-1}$$

## A.2 Proof of Proposition 3.2

*Proof.* The first order conditions of the updates in Algorithm 1 give us

$$\begin{aligned} 0 &\in \partial \|\cdot\|_{h,\mu}(V_1^{t+1}) - \rho(\widetilde{W}\gamma^t - V_1^{t+1}) - \Lambda_1^t \\ 0 &\in \mathbf{1}_{G_R}(V_2^{t+1}) - \rho(\gamma^t - V_2^{t+1}) - \Lambda_2^t \\ 0 &\in -2(\gamma^{t+1})^{-T} + \rho\widetilde{W}^T(\widetilde{W}\gamma^{t+1} - V_1^{t+1}) + \widetilde{W}^T\Lambda_1^t + \\ &\quad \rho(\gamma^{t+1} - V_2^{t+1}) + \Lambda_2^t + \mathbf{1}_K(\nu^{t+1})^T \text{ s.t. } \gamma^{t+1}\mathbf{1} = \mathbf{a} \end{aligned} \quad (17)$$

Note that the first order condition for  $\gamma^{t+1}$  is different as it is a equality constrained convex problem. Also, by the definitions of  $\Lambda_1^{t+1}$  and  $\Lambda_2^{t+1}$

$$\begin{aligned} \Lambda_1^{t+1} &= \Lambda_1^t + \rho(\widetilde{W}\gamma^{t+1} - V_1^{t+1}) \\ \Lambda_2^{t+1} &= \Lambda_2^t + \rho(\gamma^{t+1} - V_2^{t+1}) \end{aligned} \quad (18)$$

Then, combining these two sets of equations, we have that

$$\begin{aligned} \Lambda_1^{t+1} + \rho\widetilde{W}(\gamma^t - \gamma^{t+1}) &\in \partial \|\cdot\|_{h,\mu}(V_1^{t+1}) \\ \Lambda_2^{t+1} + \rho(\gamma^t - \gamma^{t+1}) &\in \partial \mathbf{1}_{G_R}(V_2^{t+1}) \\ 2(\gamma^{t+1})^{-T} - \mathbf{1}_K(\nu^{t+1})^T &= \widetilde{W}^T\Lambda_1^{t+1} + \Lambda_2^{t+1} \\ \frac{1}{\rho}(\Lambda_1^{t+1} - \Lambda_1^t) &= \widetilde{W}\gamma^{t+1} - V_1^{t+1} \\ \frac{1}{\rho}(\Lambda_2^{t+1} - \Lambda_2^t) &= \gamma^{t+1} - V_2^{t+1} \end{aligned} \quad (19)$$

Then, let us define  $(\gamma^t, V_1^t, V_2^t, \Lambda_1^t, \Lambda_2^t)_{t=1}^\infty$  be a sequence of iterates with a limit point  $(\gamma^*, V_1^*, V_2^*, \Lambda_1^*, \Lambda_2^*)$ . Then, by the last two equations of (19), we have that  $\widetilde{W}\gamma^* = \widetilde{W}V_2^* = V_1^*$ . Therefore, the first two equations give us that

$$\begin{aligned} \Lambda_1^* &\in \partial \|\cdot\|_{h,\mu}(V_1^*) = \partial \|\cdot\|_{h,\mu}(\widetilde{W}\gamma^*) \\ \Lambda_2^* &\in \partial \mathbf{1}_{G_R}(V_2^*) = \partial \mathbf{1}_{G_R}(\gamma^*) \end{aligned}$$

Lastly, using the third equation in (19), it follows that

$$\begin{aligned} 2(\gamma^*)^{-T} - \mathbf{1}_K(\nu^*)^T &= \\ \widetilde{W}^T\Lambda_1^* + \Lambda_2^* &\in \partial \|\cdot\|_{h,\mu}(\widetilde{W}\gamma^*) + \partial \mathbf{1}_{G_R}(\gamma^*) \end{aligned}$$

Noting that the optimality condition for  $\arg \min_\gamma -\log |\det(\gamma\gamma^T)|$  s.t.  $\gamma\mathbf{1} = \mathbf{a}$  is

$$-2(\gamma^*)^{-T} + \mathbf{1}_K(\nu^*)^T = 0 \quad \text{and} \quad \gamma^*\mathbf{1} = \mathbf{a}$$

We have that

$$\begin{aligned} \mathbf{0} &= -2(\gamma^*)^{-T} + \mathbf{1}_K(\nu^*)^T + 2(\gamma^*)^{-T} - \mathbf{1}_K(\nu^*)^T \\ &= -2(\gamma^*)^{-T} + \mathbf{1}_K(\nu^*)^T + \widetilde{W}^T\Lambda_1^* + \Lambda_2^* \in \partial f(\gamma^*) \end{aligned}$$

and we have that  $\gamma^*\mathbf{1} = \mathbf{a}$  by the formulation of our update for  $\gamma^t$ . This shows that  $\gamma^*$  satisfies the optimality condition of (10) and thus a stationary point for  $f$ .  $\square$

## B Simulations

We demonstrate the computational benefit as well as the accuracy of our model in terms of perplexity. The experiments are based on the simulated data from the LDA model, and we focus on the comparison to the variational EM (VEM) and Gibbs sampling to illustrate the advantages of our method. As part of the future work, we plan to compare the stochastic implementation of MVTM with GDM (Yurochkin and Nguyen, 2016) and the improved implementations of the Gibbs sampling presented in Li et al. (2014) and Yuan et al. (2015) at a much larger scale.

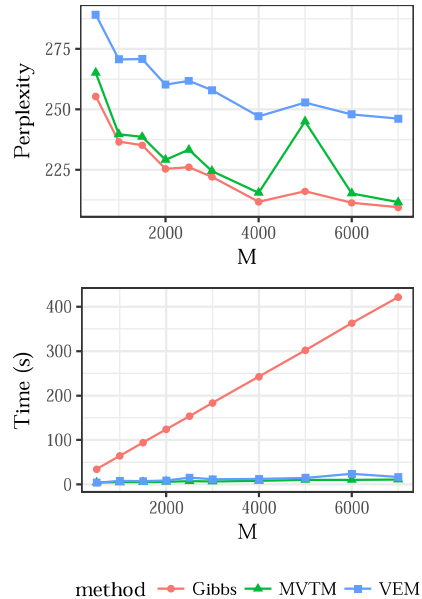

Figure 7: Perplexity of the held-out data and the corresponding time complexity of each method at varying values of the number of documents  $M$  with  $N_m = 1000$ ,  $K = 5$ ,  $V = 1200$ ,  $\eta = 0.1$  and  $\alpha = 0.1$

We first look at the behavior of the algorithms as  $M$  increases when  $N_m = 1000$  (Figure 8). At  $N_m = 1000$ , we are working with the setting that is close to the asymptotic regime, and MVTM has the computational speed comparable to VEM and the statistical performance similar to the Gibbs sampling.

In a more challenging case with the shorter documents at  $N_m = 100$ , MVTM continues to perform as well as the Gibbs sampling with a little additional computational cost. This performance comparison would be of interest for the researchers who are working with shorter documents present in the modern application. As discussed in Tang et al. (2014) and Nguyen (2015), the limitation of LDA comes from the document lengths. Our results show that MVTM

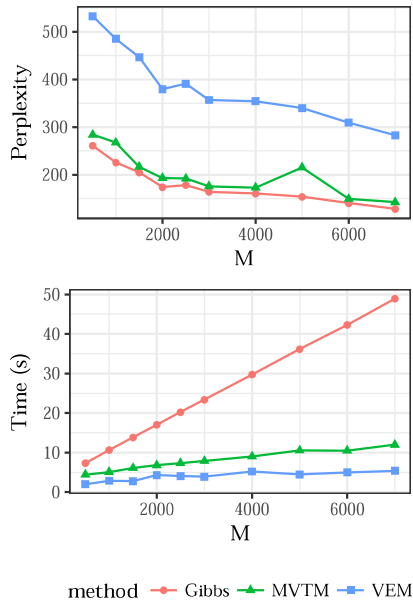

Figure 8: Perplexity of the held-out data and the corresponding time complexity of each method at varying values of the number of documents  $M$  with  $N_m = 100$ ,  $K = 5$ ,  $V = 1200$ ,  $\eta = 0.1$  and  $\alpha = 0.1$

do not suffer from the short documents in terms of statistical performance, when the regularization parameter  $\mu$  for the hinge loss is appropriately chosen. The current batch implementation, however, suffers from the number of documents present in the dataset, as it has to soft-threshold every document. This computational limitation, however, can be alleviated by the stochastic implementation as demonstrated in the stochastic implementation of the variational method in Hoffman et al. (2013).

## C NIPS dataset Topics

### C.1 Computational Time

Figure 9 shows the time complexities of different algorithms on the NIPS dataset as we increase the number of topics. Compared to GDM, the proposed MVTM improvement on performance comes at a little computational cost. RecoverKL could achieve similar computational speed if the anchor words are provided. However, when we include the computational cost of finding the anchor words, GDM and MVTM show computational advantages over RecoverKL.

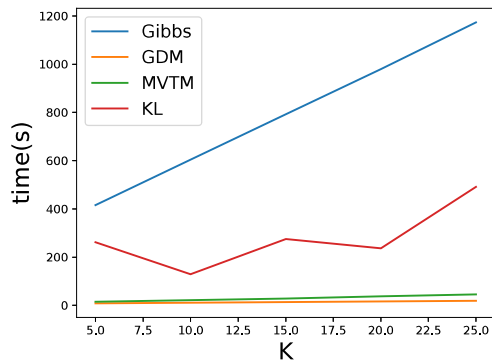

Figure 9: The computational performance of different algorithms as a function of the number of topics. NIPS dataset includes 1491 documents and 4492 unique words.

### C.2 Top 10 topics

| Topic 1                                                                                           | Topic 2                                                                                         | Topic 3                                                                                                    | Topic 4                                                                                      | Topic 5                                                                                                         | Topic 6                                                                                            | Topic 7                                                                                                     | Topic 8                                                                                             | Topic 9                                                                                                  | Topic 10                                                                                                    |
|---------------------------------------------------------------------------------------------------|-------------------------------------------------------------------------------------------------|------------------------------------------------------------------------------------------------------------|----------------------------------------------------------------------------------------------|-----------------------------------------------------------------------------------------------------------------|----------------------------------------------------------------------------------------------------|-------------------------------------------------------------------------------------------------------------|-----------------------------------------------------------------------------------------------------|----------------------------------------------------------------------------------------------------------|-------------------------------------------------------------------------------------------------------------|
| neuron<br>network<br>input<br>model<br>pattern<br>neural<br>synaptic<br>learning<br>cell<br>spike | input<br>output<br>system<br>circuit<br>signal<br>neural<br>network<br>chip<br>weight<br>analog | training<br>set<br>network<br>recognition<br>data<br>algorithm<br>vector<br>learning<br>classifier<br>word | training<br>error<br>set<br>data<br>cell<br>input<br>network<br>classifier<br>weight<br>test | algorithm<br>learning<br>data<br>problem<br>weight<br>method<br>function<br>distribution<br>vector<br>parameter | unit<br>network<br>input<br>hidden<br>weight<br>output<br>layer<br>learning<br>pattern<br>training | model<br>data<br>parameter<br>distribution<br>system<br>object<br>gaussian<br>likelihood<br>cell<br>mixture | network<br>neural<br>system<br>problem<br>training<br>control<br>dynamic<br>unit<br>result<br>point | function<br>set<br>approximation<br>result<br>linear<br>bound<br>number<br>point<br>network<br>threshold | learning<br>system<br>control<br>function<br>action<br>algorithm<br>task<br>reinforcement<br>error<br>model |

Table 2: Top 10 MVTM topic for NIPS dataset

| Topic 1                                                                                             | Topic 2                                                                                         | Topic 3                                                                                                | Topic 4                                                                                                            | Topic 5                                                                                           | Topic 6                                                                                           | Topic 7                                                                                                    | Topic 8                                                                                           | Topic 9                                                                                                           | Topic 10                                                                                                       |
|-----------------------------------------------------------------------------------------------------|-------------------------------------------------------------------------------------------------|--------------------------------------------------------------------------------------------------------|--------------------------------------------------------------------------------------------------------------------|---------------------------------------------------------------------------------------------------|---------------------------------------------------------------------------------------------------|------------------------------------------------------------------------------------------------------------|---------------------------------------------------------------------------------------------------|-------------------------------------------------------------------------------------------------------------------|----------------------------------------------------------------------------------------------------------------|
| neuron<br>cell<br>model<br>input<br>activity<br>synaptic<br>pattern<br>response<br>firing<br>cortex | circuit<br>signal<br>system<br>neural<br>analog<br>chip<br>output<br>current<br>input<br>neuron | recognition<br>speech<br>word<br>system<br>training<br>hmm<br>character<br>model<br>network<br>context | set<br>training<br>data<br>algorithm<br>error<br>performance<br>classifier<br>classification<br>number<br>learning | model<br>memory<br>representation<br>node<br>rules<br>tree<br>structure<br>level<br>graph<br>rule | network<br>input<br>unit<br>weight<br>neural<br>output<br>learning<br>training<br>layer<br>hidden | function<br>algorithm<br>learning<br>point<br>vector<br>result<br>case<br>problem<br>parameter<br>equation | image<br>object<br>images<br>field<br>map<br>visual<br>motion<br>feature<br>direction<br>features | model<br>data<br>distribution<br>gaussian<br>parameter<br>mean<br>algorithm<br>probability<br>method<br>component | learning<br>control<br>system<br>action<br>model<br>dynamic<br>policy<br>algorithm<br>reinforcement<br>problem |

Table 3: Top 10 Gibbs topic for NIPS dataset

| Topic 1  | Topic 2 | Topic 3     | Topic 4    | Topic 5        | Topic 6  | Topic 7      | Topic 8     | Topic 9     | Topic 10      |
|----------|---------|-------------|------------|----------------|----------|--------------|-------------|-------------|---------------|
| neuron   | input   | word        | data       | image          | network  | model        | cell        | learning    | learning      |
| network  | output  | speech      | set        | images         | unit     | data         | visual      | algorithm   | control       |
| spike    | weight  | recognition | training   | object         | neural   | parameter    | motion      | function    | model         |
| synaptic | neural  | system      | error      | point          | weight   | likelihood   | direction   | problem     | system        |
| input    | network | training    | function   | features       | hidden   | mixture      | response    | action      | task          |
| pattern  | net     | character   | vector     | graph          | training | distribution | orientation | policy      | movement      |
| firing   | chip    | human       | method     | representation | output   | algorithm    | neuron      | optimal     | controller    |
| model    | layer   | speaker     | classifier | feature        | input    | set          | model       | gradient    | motor         |
| activity | analog  | context     | kernel     | information    | error    | gaussian     | frequency   | convergence | dynamic       |
| neural   | bit     | network     | gaussian   | recognition    | function | variables    | field       | step        | reinforcement |

Table 4: Top 10 GDM topic for NIPS dataset
